# Supplementary material
Source: PubMed Central journal article supplement (PMC6719298)
Supplement: NIHMS1047820-supplement-1.pdf [file NIHMS1047820-supplement-1.pdf]

**Supplemental Material**

## Supplemental Table 1.

*Comparison of missing and non-missing variables by age, sex, BMI*

| <b>Variable</b> | <b>Missing* (n=494)</b> | <b>Non-missing (n=468)</b> | <b>P-value</b> |
|-----------------|-------------------------|----------------------------|----------------|
| Age (mean/SD)   | 53.6 (7.2)              | 52.6 (6.9)                 | 0.033          |
| Female (n%)     | 522 (52.7)              | 468 (47.3)                 | 0.558          |
| BMI (mean/SD)   | 23.4 (5.2)              | 22.9 (4.3)                 | 0.116          |

\*Note: Missing means that the variable has no fasting and A1C or FPG measures recorded

## Supplemental Table 2.

*Sensitivity and specificity of different A1c cutoff points by serostatus*

| <b>A1c Threshold</b> | <b>Total Cohort</b>         |                             | <b>PLWH</b>                 |                             | <b>HIV-uninfected</b>       |                             |
|----------------------|-----------------------------|-----------------------------|-----------------------------|-----------------------------|-----------------------------|-----------------------------|
|                      | <b>Sensitivity (95% CI)</b> | <b>Specificity (95% CI)</b> | <b>Sensitivity (95% CI)</b> | <b>Specificity (95% CI)</b> | <b>Sensitivity (95% CI)</b> | <b>Specificity (95% CI)</b> |
| 5.5%                 | <b>75%</b><br>(53-90%)      | <b>69%</b><br>(64-73%)      | <b>100%</b><br>(74-100*%)   | <b>77%</b><br>(72-82%)      | <b>50%</b><br>(21-79%)      | <b>55%</b><br>(47-63%)      |
| 5.7%                 | <b>67%</b><br>(45-84%)      | <b>86%</b><br>(82-89%)      | <b>92%</b><br>(62-100%)     | <b>91%</b><br>(87-94%)      | <b>42%</b><br>(15-72%)      | <b>77%</b><br>(70-84%)      |
| 6.0%                 | <b>63%</b><br>(41-81%)      | <b>91%</b><br>(87-93%)      | <b>83%</b><br>(52-98%)      | <b>93%</b><br>(90-96%)      | <b>42%</b><br>(15-72%)      | <b>86%</b><br>(79-91%)      |
| 6.5%                 | <b>46%</b><br>(26-67%)      | <b>98%</b><br>(96-99%)      | <b>75%</b><br>(43-95%)      | <b>99%</b><br>(96-100%)     | <b>17%</b><br>(02-48%)      | <b>97%</b><br>(93-99%)      |

\*one-sided, 97.5% CI

## Supplemental Table 3

| Section & Topic          | No         | Item                                                                                                                                                   | Reported on page # |
|--------------------------|------------|--------------------------------------------------------------------------------------------------------------------------------------------------------|--------------------|
| <b>TITLE OR ABSTRACT</b> |            |                                                                                                                                                        |                    |
|                          | <b>1</b>   | Identification as a study of diagnostic accuracy using at least one measure of accuracy (such as sensitivity, specificity, predictive values, or AUC)  | 1                  |
| <b>ABSTRACT</b>          |            |                                                                                                                                                        |                    |
|                          | <b>2</b>   | Structured summary of study design, methods, results, and conclusions (for specific guidance, see STARD for Abstracts)                                 | 1                  |
| <b>INTRODUCTION</b>      |            |                                                                                                                                                        |                    |
|                          | <b>3</b>   | Scientific and clinical background, including the intended use and clinical role of the index test                                                     | 2-4                |
|                          | <b>4</b>   | Study objectives and hypotheses                                                                                                                        | 4                  |
| <b>METHODS</b>           |            |                                                                                                                                                        |                    |
| <i>Study design</i>      | <b>5</b>   | Whether data collection was planned before the index test and reference standard were performed (prospective study) or after (retrospective study)     | 5                  |
| <i>Participants</i>      | <b>6</b>   | Eligibility criteria                                                                                                                                   | 5                  |
|                          | <b>7</b>   | On what basis potentially eligible participants were identified (such as symptoms, results from previous tests, inclusion in registry)                 | 5                  |
|                          | <b>8</b>   | Where and when potentially eligible participants were identified (setting, location and dates)                                                         | 5                  |
|                          | <b>9</b>   | Whether participants formed a consecutive, random or convenience series                                                                                | 5                  |
| <i>Test methods</i>      | <b>10a</b> | Index test, in sufficient detail to allow replication                                                                                                  | 7                  |
|                          | <b>10b</b> | Reference standard, in sufficient detail to allow replication                                                                                          | 7                  |
|                          | <b>11</b>  | Rationale for choosing the reference standard (if alternatives exist)                                                                                  | 7                  |
|                          | <b>12a</b> | Definition of and rationale for test positivity cut-offs or result categories of the index test, distinguishing pre-specified from exploratory         | 7                  |
|                          | <b>12b</b> | Definition of and rationale for test positivity cut-offs or result categories of the reference standard, distinguishing pre-specified from exploratory | 6-7                |
|                          | <b>13a</b> | Whether clinical information and reference standard results were available to the performers/readers of the index test                                 | 5-6                |
|                          | <b>13b</b> | Whether clinical information and index test results were available to the assessors of the reference standard                                          | 5-6                |
| <i>Analysis</i>          | <b>14</b>  | Methods for estimating or comparing measures of diagnostic accuracy                                                                                    | 6-7                |
|                          | <b>15</b>  | How indeterminate index test or reference standard results were handled                                                                                | 6-7                |
|                          | <b>16</b>  | How missing data on the index test and reference standard were handled                                                                                 | 8                  |
|                          | <b>17</b>  | Any analyses of variability in diagnostic accuracy, distinguishing pre-specified from exploratory                                                      | 7-8                |

|                          |            |                                                                                                             |            |
|--------------------------|------------|-------------------------------------------------------------------------------------------------------------|------------|
|                          | <b>18</b>  | Intended sample size and how it was determined                                                              | 8          |
| <b>RESULTS</b>           |            |                                                                                                             |            |
| <i>Participants</i>      | <b>19</b>  | Flow of participants, using a diagram                                                                       |            |
|                          | <b>20</b>  | Baseline demographic and clinical characteristics of participants                                           | 8, 17      |
|                          | <b>21a</b> | Distribution of severity of disease in those with the target condition                                      | 8-9, 17    |
|                          | <b>21b</b> | Distribution of alternative diagnoses in those without the target condition                                 |            |
|                          | <b>22</b>  | Time interval and any clinical interventions between index test and reference standard                      | 8-9        |
| <i>Test results</i>      | <b>23</b>  | Cross tabulation of the index test results (or their distribution) by the results of the reference standard | 19, 20     |
|                          | <b>24</b>  | Estimates of diagnostic accuracy and their precision (such as 95% confidence intervals)                     | 8-10       |
|                          | <b>25</b>  | Any adverse events from performing the index test or the reference standard                                 |            |
| <b>DISCUSSION</b>        |            |                                                                                                             |            |
|                          | <b>26</b>  | Study limitations, including sources of potential bias, statistical uncertainty, and generalisability       | 12, 13     |
|                          | <b>27</b>  | Implications for practice, including the intended use and clinical role of the index test                   | 13         |
| <b>OTHER INFORMATION</b> |            |                                                                                                             |            |
|                          | <b>28</b>  | Registration number and name of registry                                                                    | 5          |
|                          | <b>29</b>  | Where the full study protocol can be accessed                                                               | 5          |
|                          | <b>30</b>  | Sources of funding and other support; role of funders                                                       | Cover page |

Adapted from the STARD 2015: An Updated List of Essential Items for Reporting Diagnostic Accuracy Studies retrieved from <http://www.equator-network.org/reporting-guidelines/stard/>
